1 **Population genomics of *Bacillus anthracis* from an anthrax hyperendemic area**  
2 **reveals transmission processes across spatial scales and unexpected within-host**  
3 **diversity**

4 Taya L. Forde<sup>1\*</sup>, Tristan P. W. Dennis<sup>1</sup>, O. Rhoda Aminu<sup>1</sup>, William T. Harvey<sup>1</sup>, Ayesha  
5 Hassim<sup>2</sup>, Ireen Kiwelu<sup>3</sup>, Matej Medvecký<sup>1</sup>, Deogratius Mshanga<sup>4</sup>, Henriette Van Heerden<sup>2</sup>,  
6 Adeline Vogel<sup>1</sup>, Ruth N. Zadoks<sup>1,#</sup>, Blandina T. Mmbaga<sup>3,5</sup>, Tiziana Lembo<sup>1¶</sup>, Roman Biek<sup>1¶</sup>

7  
8 <sup>1</sup> Institute of Biodiversity, Animal Health & Comparative Medicine, University of Glasgow,  
9 Glasgow, United Kingdom

10 <sup>2</sup> Department of Veterinary Tropical Diseases, Faculty of Veterinary Science, University of  
11 Pretoria, Onderstepoort, South Africa

12 <sup>3</sup> Kilimanjaro Clinical Research Institute, Kilimanjaro Christian Medical Centre, Moshi,  
13 Tanzania

14 <sup>4</sup> Tanzania Veterinary Laboratory Agency, Northern Zone, Arusha, Tanzania

15 <sup>5</sup> Kilimanjaro Christian Medical University College, Moshi, Tanzania

16 <sup>#</sup> Current address: Sydney School of Veterinary Science, University of Sydney, Sydney,  
17 Australia

18 \* Corresponding author

19 E-mail: [taya.forde@glasgow.ac.uk](mailto:taya.forde@glasgow.ac.uk) (TLF)

20 ¶ These authors contributed equally to this work.

## 21 **Abstract**

22 Genomic sequencing has revolutionized our understanding of bacterial disease epidemiology, but  
23 remains underutilized for zoonotic pathogens in remote endemic settings. Anthrax, caused by the  
24 spore-forming bacterium *Bacillus anthracis*, remains a threat to human and animal health and  
25 rural livelihoods in low- and middle-income countries. While the global genomic diversity of *B.*  
26 *anthracis* has been well-characterized, there is limited information on how its populations are  
27 genetically structured at the scale at which transmission occurs, critical for understanding the  
28 pathogen's evolution and transmission dynamics. Using a uniquely rich dataset, we quantified  
29 genome-wide single nucleotide polymorphisms (SNPs) among 73 *B. anthracis* isolates derived  
30 from 33 livestock carcasses sampled over one year throughout the Ngorongoro Conservation  
31 Area, Tanzania, an area hyperendemic for anthrax. Genome-wide SNPs distinguished 22 unique  
32 *B. anthracis* genotypes within the study area. However, phylogeographic structure was lacking,  
33 as identical SNP profiles were found throughout the study area, likely the result of the long and  
34 variable periods of spore dormancy and long-distance livestock movements. Significantly,  
35 divergent genotypes were obtained from spatio-temporally linked cases and even individual  
36 carcasses. The high number of SNPs distinguishing isolates from the same host is unlikely to  
37 have arisen during infection, as supported by our simulation models. This points to an  
38 unexpectedly wide transmission bottleneck for *B. anthracis*, with an inoculum comprising  
39 multiple variants being the norm. Our work highlights that inferring transmission patterns of *B.*  
40 *anthracis* from genomic data will require analytical approaches that account for extended and  
41 variable environmental persistence as well as co-infection.

## 42 **Importance**

43 Pathogens transmitted between animals and people affect the health and livelihoods of farmers,  
44 particularly in developing countries dependent on livestock. Understanding over what distances  
45 these pathogens are transmitted and how they evolve is important to inform control strategies  
46 towards reducing disease impacts. Information on the circulation of *Bacillus anthracis*, which  
47 causes the often-lethal disease anthrax, is lacking for settings where the disease is commonplace.  
48 Consequently, we examined its genetic variability in an area in Tanzania where anthrax is  
49 widespread. We found no clear link between how closely cases were sampled and their genetic  
50 similarity. We suspect this lack of congruence is primarily driven by large-scale livestock  
51 movements, which control efforts should take into consideration. Another significant finding was  
52 the co-occurrence of multiple *B. anthracis* types within individual hosts, suggesting animals are  
53 commonly infected with a mixture of variants. This needs to be accounted for when investigating  
54 possible connections between cases.

## 55 **Introduction**

56 Genomic data have the potential to transform our understanding of the evolution and  
57 epidemiology of pathogens of public health importance (1). However, this potential has yet to be  
58 fully harnessed for many zoonotic diseases that occur in hard-to-reach areas. Anthrax remains  
59 endemic in many low- and middle-income countries (LMICs) worldwide (2). It is a disease  
60 characterized by sudden deaths in herbivorous livestock and wildlife, and can also cause serious,  
61 potentially fatal disease in people (3). Anthrax is classified among the neglected zoonoses: a  
62 group of diseases shared by animals and people that, due to their occurrence in remote,  
63 disadvantaged communities, collectively receive less than 0.1% of international global health  
64 assistance (4). As for many neglected zoonoses, there is limited genomic data for *Bacillus*  
65 *anthracis*, the bacterium that causes anthrax, from endemic LMIC settings where surveillance  
66 tends to be limited. Such data could help to improve our understanding of transmission  
67 processes, such as how *B. anthracis* is spread within and between outbreaks, and ultimately  
68 contribute to more informed disease management.

69 The genomic diversity of *B. anthracis* has been well-described at a global scale. Isolates can be  
70 broadly divided into three major clades (A, B, C), of which A clade is the most widespread and  
71 globally dominant (5–7). Isolates from most *B. anthracis* lineages have been found across  
72 geographically widespread areas, often spanning multiple continents (7). While particular  
73 variants often predominate regionally, high lineage diversity has also been reported, including  
74 co-circulation of strains from multiple lineages (8, 9). How *B. anthracis* diversity is structured at  
75 smaller scales is less well-defined. The pathogen has limited genomic diversity compared to  
76 other bacterial species (i.e. is genetically monomorphic), rendering standard genotyping methods  
77 such as multi-locus sequence typing insufficiently discriminatory (10). A hierarchical genotyping

78 scheme known as PHRANA was therefore developed specifically for *B. anthracis*, based on  
79 quickly evolving repetitive regions nested within more phylogenetically stable markers –  
80 canSNPs – that distinguish among the major lineages (5, 11). Variants of this scheme have been  
81 used to examine the diversity of *B. anthracis* in several endemic settings globally, including in a  
82 few African countries (8, 12–14). Genome-wide SNP data would offer higher resolution for  
83 discriminating among closely-related isolates. However, whole genome sequencing (WGS)  
84 features in only a few studies of local *B. anthracis* diversity (15–18), and has rarely been  
85 conducted outside Europe (19), so the potential for phylogenomic data to be used to understand  
86 transmission patterns within hyperendemic areas has yet to be explored.

87 Transmission of *B. anthracis* occurs primarily through the environment. After causing the death  
88 of the animal host, vegetative bacteria are released into the environment via bodily fluids. Here,  
89 upon exposure to oxygen and cues related to a lack of nutrients, these bacteria sporulate and can  
90 persist in a dormant yet infectious state for several decades (3, 20). While the viability of spores  
91 decreases over time, new *B. anthracis* infections could theoretically arise from recent cases or  
92 cases that occurred several years or even decades previously. How this environmental  
93 persistence shapes the spatio-temporal diversity of *B. anthracis* in endemic settings has never  
94 been investigated.

95 In molecular epidemiological studies of bacterial pathogens, a single isolate is typically  
96 sequenced from each individual case. However, this approach fails to recognize the bacterial  
97 population diversity that may exist within the host (21, 22). Such diversity can either result from  
98 mutations that arise during infection, or from heterogeneity (multiple variants) in the inoculum,  
99 either through co-infection (exposure to multiple variants simultaneously) or superinfection  
100 (multiple exposures) (23, 24). Under those scenarios, a single isolate is unlikely to represent the

101 overall diversity of the pathogen within the host, and as a result this approach can lead to  
102 erroneous inferences about transmission pathways (25). The importance of capturing within-host  
103 diversity is therefore increasingly recognized (26, 27). In the case of anthrax, multiple genotypes  
104 of *B. anthracis* have been previously found within individual hosts (28–30), but it remains  
105 unclear whether this represents a more widespread phenomenon.

106 The objective of this study was to quantify the genomic diversity of *B. anthracis* at hierarchical  
107 spatial scales within the livestock population of a hyperendemic setting. This was accomplished  
108 using a unique dataset including 1) isolates collected throughout a large (~8,300 km<sup>2</sup>) area of  
109 northern Tanzania where anthrax is widespread; 2) among spatio-temporally linked cases; and 3)  
110 within individual hosts, assessing multiple isolates from the same and different sample types  
111 associated with a case (e.g. tissue, blood, soil).

## 112 **Results**

### 113 **Genomic sequencing of *B. anthracis* isolates enabled assessment of diversity at** 114 **hierarchical spatial scales**

115 *Bacillus anthracis* isolates were recovered from livestock carcasses in the Ngorongoro  
116 Conservation Area (NCA), part of the Serengeti ecosystem of northern Tanzania. The 73 isolates  
117 from which WGS data were obtained were from a total of 33 carcass sites sampled throughout  
118 the NCA (Table S1). Carcasses were of the following species: sheep (n = 18), cattle (n = 7),  
119 goats (n = 4), donkey (n = 1) or unknown host (n = 3). The diversity of *B. anthracis* was assessed  
120 at multiple hierarchical spatial scales (Fig. 1). Carcasses for which detailed sampling location  
121 data were available (n = 32) could be grouped into four distinct areas within the NCA (central,  
122 north, south, east), referred to herein as ‘geographical groups’. To assess the genomic relatedness

123 among spatio-temporally-linked cases, on four occasions, samples were collected from two  
124 carcasses either from the same or neighboring households on the same or consecutive days,  
125 which we refer to as ‘epidemiological clusters’. Three of these clusters were in the central  
126 geographical group, while the fourth was in the southern group of carcasses sampled. Finally,  
127 multiple isolates (n = 2-4) were sequenced from a single carcass for 21 carcasses. These were  
128 either i) isolates from multiple sample types (i.e. tissue, blood, swabs, soil and/or insects) from a  
129 single carcass (n = 16 carcasses) and/or ii) multiple isolates from the same sample (n = 15  
130 carcasses). Isolates contributing to investigations of diversity at each hierarchical level are  
131 detailed in Table S1, along with individual sequence quality metrics. Mapped reads had an  
132 average depth of coverage of 85X across isolates, ranging from 24X – 245X (median 72X).

### 133 ***B. anthracis* within the NCA is limited to a single subgroup lacking clear** 134 **phylogeographic signal**

135 All *B. anthracis* isolates from the NCA were found to belong to the Ancient A subgroup of Clade  
136 A (Fig. 2). Within this subgroup, the NCA isolates formed a monophyletic clade within Cluster  
137 3.2 as defined by Bruce et al. (7), which also contained the isolate A2075 (GenBank accession  
138 SRR2968187), isolated in 1999 from a baboon in Muhesi Game Reserve, central Tanzania.

139 A total of 125 SNPs polymorphic among the NCA isolates and A2075 were retained for analysis,  
140 of which 13 were unique to A2075. Twenty-two unique genotypes (SNP profiles) were found  
141 among the 73 NCA isolates (Fig. 3). Based on a rarefaction analysis, the observed genotypic  
142 diversity was close to that present throughout the study area (i.e. further sampling would have  
143 been unlikely to reveal additional genotypes; Fig. S1). The maximum pairwise nucleotide  
144 difference between any two NCA-derived isolates was 49 SNPs [median = 24, interquartile range

145 (IQR) = 10-35] (Fig. S2). There was no clear relationship between the pairwise nucleotide  
146 differences and the geographical distance between sampling locations (Fig. S3), as confirmed by  
147 a test for isolation by distance ( $r = 0.04$ ,  $p = 0.214$ ). Isolates from the central, eastern and  
148 southern geographical groups were observed throughout the phylogenetic tree, while all isolates  
149 from the northern sampling area were restricted to a single clade that contained the majority of  
150 NCA isolates (Fig. 3). In eight instances, identical *B. anthracis* genotypes were found in  
151 carcasses from different geographical groups, all of which involved isolates from the central  
152 geographical group and one of the other areas, with all areas implicated (Table S3). Identical or  
153 nearly identical SNP profiles (1 SNP difference) were obtained from carcasses sampled 3-5  
154 months apart on six occasions, and 10 months apart on one occasion (Table S4).

155 ***B. anthracis* isolates from spatio-temporally linked cases are rarely genetically**  
156 **related**

157 Between one and four isolates were sequenced from each carcass sampled as part of an  
158 epidemiological cluster (i.e. pair of spatio-temporally linked carcasses), resulting in between 4-8  
159 isolates per cluster. In most cases, isolates deriving from the same epidemiological cluster were  
160 phylogenetically unrelated. Only in one of the four clusters examined (C2) did both carcasses  
161 contain isolates with identical core SNP profiles (Fig. 3B, S6 and S7). Overall, isolates from  
162 different carcasses within the same epidemiological cluster had similar numbers of SNP  
163 differences when compared with randomly selected carcasses (linked cases: median = 21, IQR =  
164 0-33; unlinked cases: median = 23, IQR = 10-35) (Fig. 4).

165 **Within-host diversity of *B. anthracis* is similar to between-host diversity in the**  
166 **NCA**



167 Overall, the number of pairwise SNP differences between isolates from the same carcass was  
168 lower than that found between isolates from different carcasses [same: median = 11, interquartile  
169 range = 0-34; different: median = 23, interquartile range = 10-35] (Fig. 4). However, isolates  
170 with multiple distinct genotypes were obtained on 15 of 21 occasions wherein multiple isolates  
171 were sequenced from the same carcass, with as many as 43 SNP differences between isolates  
172 (Fig. 5). A high level of divergence was seen, regardless of whether isolates were from the same  
173 or different sample type (e.g. multiple isolates from a tissue sample vs. isolates from tissue and  
174 soil samples, Fig. 5A). Divergent genotypes were observed in all carcasses from which three or  
175 more isolates were sequenced (12/12), and in a third (3/9) of carcasses for which two isolates  
176 were sequenced. A single SNP difference separated one isolate from two others within one  
177 carcass (AN16-83) and two SNP differences separated two isolates from a single soil sample  
178 (LNA). All other pairwise within-host SNP differences were eight or above. All of the within-  
179 host SNP profiles detected were shared with those from other carcasses.

## 180 **Observed within-host diversity is unlikely to have arisen during the course of** 181 **infection**

182 To assess the likelihood of different levels of within-host diversity arising during the course of  
183 infection, we performed simulation modelling of *B. anthracis* infection with a homogenous  
184 inoculum of varying size (1, 2, 5, 10, 20, 50 and 100 bacterial genomes), and across a range of  
185 replication cycles (up to 25 generations) using previously established mutation rates (29). With  
186 an infectious dose  $d$ , discrete generations and no die-off, the population size in generation  $i$  is  
187 therefore  $d \times 2^{(i-1)}$ . Averaging across simulations with varying initial doses, in the 25<sup>th</sup>  
188 generation, 90.0% of the population was identical to the infecting dose, 9.53% differed by 1  
189 SNP, and 0.489% by 2 SNPs, with higher numbers of mutations very rare (<0.01%). While

190 stochasticity was present in early generations and particularly at low inoculum doses (Fig. S8-  
191 10), the mean proportion of genomes with various numbers of SNPs changed predictably after  
192 the initial generations (Fig. 6A-B). Extrapolating to the 40<sup>th</sup> generation, then ~84% of the  
193 population would be expected to be identical to the infecting dose, ~15% differing by 1 SNP and  
194 ~0.9% by 2 SNPs.

195 To illustrate how this within-host generated diversity would be captured in our sampling, pairs of  
196 genomes were repeatedly sampled from simulated populations and pairwise differences  
197 calculated (Fig 6C and 6D, File S1). Overall, pairwise differences greater than 2 SNPs occurred  
198 in less than 0.2% of all simulated populations (Table S5). Higher SNP distances such as those  
199 observed (Fig. 5B) are therefore unlikely to arise within-host following infection with a  
200 homogenous inoculum.

## 201 **Discussion**

202 Genomic data for understanding the population structure and transmission patterns of bacterial  
203 zoonoses has been limited for LMIC settings where these diseases tend to have the greatest  
204 impact. Despite *B. anthracis* having limited genomic diversity in comparison with other bacterial  
205 species, WGS provided sufficient resolution to discriminate among isolates collected from within  
206 a relatively small geographic area of a few thousand square kilometers. The way in which the  
207 genomic diversity was partitioned across hierarchical spatial scales within this area has a series  
208 of novel implications for our understanding of how the pathogen is transmitted and evolves  
209 during endemic circulation.

210 ***B. anthracis* diversity within the hyperendemic NCA region is limited to a**  
211 **single Clade A sub-group**

212 The NCA is an area where anthrax has likely been endemic for decades, if not centuries. Local  
213 community members claim that it has been an issue for their health and that of their livestock  
214 throughout living memory. Despite WGS providing sufficient discriminatory power to  
215 differentiate among individual *B. anthracis* isolates in this setting, fewer than 50 SNP differences  
216 were found among NCA isolates across the 5.2 MB chromosomal genome, highlighting the  
217 degree to which this bacterial pathogen is monomorphic. All 73 sequenced isolates formed a  
218 monophyletic cluster within the Ancient A lineage – also known as canSNP group A.Br.005/006  
219 or A.Br.034 (6) – a subgroup of Clade A comprised mostly of isolates from south-eastern Africa.  
220 This contrasts with some previous studies of anthrax diversity in chronically endemic areas  
221 reporting co-circulation of isolates from multiple lineages using lower resolution markers (8, 9).  
222 Our study, which only included isolates collected over one year, can be considered a snapshot of  
223 recent diversity only. That being said, Tanzanian isolates genotyped in a previous study (n = 17)  
224 were also all found to belong to Ancient A clade (5), demonstrating that this particular lineage is  
225 dominant and well-established in this country. The most closely related publicly available isolate  
226 (A2075), sampled in central Tanzania approximately 300km away from our study area, differed  
227 from some NCA isolates by only 13 SNPs, which illustrates that highly related *B. anthracis*  
228 isolates can be geographically widespread. Broader, longitudinal WGS studies of *B. anthracis*  
229 across different regions of Africa will be needed to assess the actual range of individual  
230 genotypes over space and time.

### 231 **No phylogeographic signal observed despite considerable SNP diversity**

232 Despite the considerable diversity observed (i.e. 22 unique genotypes within the sampled  
233 population), a phylogeographic signal was not detected at the scale of this study area. The  
234 finding of identical SNP profiles across distances of tens of kilometers likely reflects the ecology

235 of anthrax in general and in our study system. First, there are few opportunities for genetic  
236 diversity to arise within the *B. anthracis* lifecycle, which is characterized by long periods of  
237 environmental dormancy in spore form, punctuated by brief interludes of a few days where it  
238 develops into its vegetative state and replicates within an infected host. It is estimated that *B.*  
239 *anthracis* undergoes only 20-40 replications per infection (11). Given its low mutation rate (5.2 –  
240  $8.3 \times 10^{-10}$  mutations/site/generation) (5, 29, 31), novel mutations would likely arise in only a  
241 small proportion of *B. anthracis* infections, as also supported by our simulations. The short time  
242 of active replication within a host also means there is minimal opportunity for horizontal gene  
243 transfer with other bacteria (11), which further restricts the ability of *B. anthracis* to diversify. It  
244 is believed that *B. anthracis* rarely multiplies outside of a host, although there is some evidence  
245 for limited environmental replication (32, 33). Viability of *B. anthracis* decays exponentially  
246 over time, although infectious spores remain detectable at carcass sites at least four years after  
247 the death of the animal (34), and under favorable conditions, spores can remain viable for up to  
248 several decades (20). It is therefore reasonable to expect that spores from a single anthrax carcass  
249 with few or no novel mutations could be the source of subsequent infections over highly variable  
250 time periods, a phenomenon referred to by Sahl et al. (2016) as a ‘time capsule’. This situation  
251 violates typical molecular clock assumptions (35), wherein SNPs would be expected to arise at a  
252 relatively steady rate within the pathogen population over time. The observation that  
253 contemporary isolates from the NCA are phylogenetically basal to isolate A2075, collected  
254 nearly two decades earlier, highlights this issue. In order for molecular clock models to be  
255 applied to environmentally-persistent pathogens such as *B. anthracis* – for instance to estimate  
256 how long particular lineages have been in circulation – current analytical frameworks will need  
257 to be extended.

258 In addition to long and variable environmental persistence, animal movements and spatial  
259 admixture likely contribute to the lack of phylogeographic structure of *B. anthracis* within this  
260 study area. Potential sources of infection are quite spatially restricted, as the highest  
261 concentrations of viable spores are found within only a few meters of anthrax carcasses (36), in  
262 what have been termed ‘localized infectious zones’ (37). However, given that the incubation  
263 period of anthrax in livestock typically ranges from 1-14 days and potentially longer (3),  
264 extensive movement can occur between the time of infection and the animal’s death, meaning  
265 the site of sampling likely does not reflect the site of infection. In parts of rural Africa where  
266 pastoralism is the main form of agriculture, livestock are moved for various reasons, including to  
267 access water, pastures and minerals. Such daily and/or seasonal livestock movements could  
268 contribute to the observation of identical SNP profiles over distances of tens of kilometers in our  
269 study area and the lack of relationship between genetic distance and geographic distance between  
270 sampling locations. While livestock appear to be the primary drivers of *B. anthracis* transmission  
271 in the NCA, movement of infected wildlife and scavengers acting as carriers of *B. anthracis*  
272 spores could represent an additional mechanism contributing to our observations (38, 39).  
273 Further comparative genomic studies across wider areas will be essential for elucidating the  
274 geographic scales at which transmission occurs. This would help to delineate areas across which  
275 coordinated livestock vaccination campaigns should occur to avoid regular re-incursions through  
276 animal movement and trade.

277 **High within-host diversity is the result of simultaneous infection with multiple**  
278 **variants, not within-host evolution**

279 We observed high *B. anthracis* diversity within individual hosts, essentially indistinguishable  
280 from levels of diversity found throughout the study area. Smaller numbers of SNPs (1-2) could

281 potentially have arisen during culture; however, based on previous passaging experiments with  
282 *B. anthracis* (29), we do not expect this to have contributed in our case due to the limited number  
283 of passages performed. Alternatively, small numbers of SNPs could have arisen during the  
284 course of infection within the host. The simulations we performed suggest that isolates with >2  
285 SNP differences between them are unlikely to be the product of within-host evolution. The  
286 regular occurrence of such differences or greater among isolates from the same carcass indicates  
287 that animals are commonly infected with a heterogenous infectious dose (i.e. ingestion of a  
288 mixture of *B. anthracis* genotypes from single or possibly multiple grazing or watering points;  
289 Fig. 7). Multiple SNP profiles were present among isolates from the same individual soil  
290 samples, supporting the occurrence of heterogeneity in a single infection source. It is also  
291 noteworthy that all within-host SNP profiles observed in this study were shared with isolates  
292 from at least one other sampled carcass (i.e. none were unique); this strongly suggests that most  
293 of the observed within-host diversity is the result of various genotypes having been present in the  
294 inoculum rather than having been generated *de novo*. This points to a wide transmission  
295 bottleneck, since a small inoculum comprising only a few spores would limit the possible  
296 diversity that could be transmitted.

297 Our findings make an important contribution to the ongoing debate about the size of the  
298 transmission bottleneck for naturally-occurring anthrax in animals (i.e. the number of spores that  
299 give rise to a case). Recent work has proposed that founding populations may be as small as 1-3  
300 individual spores (30). However, our findings are clearly at odds with such narrow bottlenecks,  
301 since the multiple genotypes we regularly observed within individual hosts could not have been  
302 transmitted within such a small inoculum. While our results provide no information about the  
303 exact size of the infectious dose, they align more closely with earlier suggestions of higher

304 infectious doses, which are biologically plausible given that animals grazing at carcass sites  
305 might ingest hundreds of thousands of spores with each bite (34).

### 306 **Spatio-temporally linked anthrax cases are rarely genetically linked**

307 Limiting phylogenetic analyses to a single isolate per host often leads to incorrect inference of  
308 transmission events (22), including the potential to overlook important epidemiological  
309 connections (40). This issue is exemplified in the current study by the spatio-temporally linked  
310 pair of cases in Cluster 2: whereas several of the isolates from both carcasses ( $n = 3$  each) had  
311 identical SNP profiles, supporting a transmission link, both carcasses also harbored non-identical  
312 genotypes (Fig. S5 and S6). Under these circumstances, transmission links may be missed, even  
313 with complete sampling. As noted by Ågren et al. (2014), in the case of multi-clonal infections,  
314 subsequent cases may stem from different genotypes from within the founding population,  
315 masking the fact that these cases stemmed from a common source, regardless of the number of  
316 isolates sequenced among the subsequent cases. This could be the case for the other three spatio-  
317 temporally linked pairs of anthrax carcasses investigated in this study (Fig. S6), in which we  
318 only detected isolates with distinct SNP profiles. Alternatively, cases without a genetic link  
319 could be temporally linked for reasons other than exposure to a common source. For instance,  
320 animals might be more susceptible or at greater risk of exposure to infection at particular times  
321 of year, e.g. due to lower immune function related to their nutritional status and/or associated  
322 with weather extremes including prolonged rains or droughts (8). More extensive sampling of  
323 within-carcass diversity would be necessary to investigate these hypotheses and to determine  
324 whether co-occurrence of genotypes could be used to track transmission patterns.

## 325 **Conclusions**

326 In this study, the genomic diversity of *B. anthracis* was quantified at various spatial scales within  
327 a hyperendemic setting. While WGS could discriminate among isolates within a relatively small  
328 geographic area, there was a lack of phylogeographic signal and limited genetic relatedness was  
329 observed among isolates from spatio-temporally linked cases. We hypothesize that this lack of  
330 spatial structure reflects the long-term persistence of *B. anthracis* spores in the environment,  
331 combined with extensive livestock movements related to local pastoralist practices. Based on  
332 simulations, the high within-host heterogeneity we observed points to an inoculum comprised of  
333 diverse genotypes, suggestive of a wide transmission bottleneck. Our work paves the way for  
334 studying *B. anthracis* genomic diversity and evolution within anthrax-endemic areas more  
335 broadly and to confirm the temporal and spatial scales over which genomic data are most  
336 informative for inferring transmission dynamics.

## 337 **Methods**

### 338 **Study area**

339 This study was conducted in the NCA of northern Tanzania, which covers 8,292 km<sup>2</sup>. Located to  
340 the south-east of Serengeti National Park, this multiple-land use area is inhabited by roughly  
341 87,000 people (41) and one million livestock (sheep, goats and cattle) (Veterinary Officer for  
342 Ngorongoro District, pers comm). Northern Tanzania remains hyperendemic for anthrax (42),  
343 and prior to this study the NCA was recognized as a potential hotspot for this disease (43).

### 344 **Research and ethical approval**



345 This study received ethical approval from the Kilimanjaro Christian Medical University College  
346 Ethics Review Committee (certificate No. 2050); the National Institute for Medical Research,  
347 Tanzania (NIMR/HQ/R.8a/Vol. IX/2660); Tanzanian Commission for Science and Technology  
348 (2016-95-NA-2016-45); and the College of Medical Veterinary and Life Sciences ethics  
349 committee at the University of Glasgow (200150152). It also received permission under Section  
350 20 of the Animal Diseases Act 35 (1984) at the University of Pretoria, South Africa (Ref  
351 12/11/1/1/6).

### 352 **Sample collection**

353 Samples were collected between May 2016 and April 2017 inclusive through active surveillance  
354 by a dedicated field team. Sudden deaths in animals reported by community members throughout  
355 the NCA were investigated and samples were collected when anthrax was suspected (File S1).  
356 When available, the following samples were collected: a piece of skin tissue (tip of the ear if the  
357 carcass was still intact, or a piece of hide if the carcass had already been opened); whole blood;  
358 swab of blood or body fluid at natural orifices; blood- or body fluid-soaked soil from below the  
359 carcass; and insects found on or around the carcass. Various metadata were recorded, including  
360 the species of animal affected and the location of sampling (Table S1, File S1). All samples were  
361 stored at ambient temperature for up to six months at local veterinary facilities until transport to  
362 the Kilimanjaro Clinical Research Institute (KCRI) in Moshi, Tanzania for molecular  
363 diagnostics, as previously described (44), with aliquots shipped to the University of Pretoria,  
364 South Africa, for selective culture and DNA extraction from *B. anthracis* isolates.

### 365 **Selective culture, DNA extraction and sequencing**

366 Sample pretreatment (i.e. to inhibit competition from heat-sensitive bacteria) is described in File  
367 S1. Sample homogenates (100  $\mu$ L) were plated onto both polymyxin-EDTA thallos acetate  
368 (PET) selective media and 5% sheep blood agar (SBA). These were incubated at 37 °C overnight  
369 and the plates inspected for growth after 15 – 24 hours incubation. The PET was then further  
370 incubated and inspected at 48 hours. Suspect *B. anthracis* colonies based on typical  
371 morphological characteristics were sub-cultured onto SBA for purification and identification  
372 (File S1). In parallel, a single colony was streaked onto a new purity plate for nucleic acid  
373 extraction. In some instances multiple isolates were selected from the same sample where the  
374 colonies demonstrated differences in morphology but were identified on the same plate and met  
375 the selection criteria (File S1).

376 DNA extracts from 75 isolates from 33 carcasses were submitted for library preparation and  
377 sequencing at MicrobesNG (Birmingham, UK). Libraries were prepared using the Nextera XT  
378 v2 kit (Illumina, San Diego, USA) and sequenced on the Illumina HiSeq platform, generating  
379 250 base pair paired-end reads.

## 380 **Bioinformatics and genomic analyses**

381 Reads were adapter trimmed by MicrobesNG using Trimmomatic v0.30 (45), and basic statistics  
382 determined using QUAST (46) (Table S1). Bacterial species identification was confirmed using  
383 Kraken (47). Based on these quality metrics, sequences from two isolates were excluded from  
384 further analyses: one due to a low number of reads (<40,000), and another that was identified as  
385 *B. cereus*. There were some further indications that not all cultures were pure *B. anthracis*,  
386 despite multiple rounds of sub-culture (File S1, Table S1). A reference-based mapping approach  
387 and strict variant filtering criteria were implemented to minimize the issues associated with the  
388 sequence quality while making use of as much of the data as possible.

389 Read mapping and variant calling were performed on the CLIMB computing platform for  
390 microbial genomics (48). Trimmed reads were aligned to the chromosome of the Ames Ancestor  
391 reference genome (NC\_007530) using bwa-mem (version 0.7.17). Picard was used to mark and  
392 remove duplicate reads, add read group information, and index the bam files (49). Quality  
393 metrics for read mapping were obtained using Qualimap (50) (Table S1). SNPs were detected in  
394 individual isolates by VarScan v2.4.4 (51) with parameters set as follows: minimum read depth  
395 of 4; minimum base quality of 20; variant allele frequency  $\geq 0.95$ . Subsequent SNP curation  
396 steps are described in File S1. Custom python scripts for the assessment of read mapping SNP  
397 metrics data, variant site filtering and generation of variant call and alignment files (source codes  
398 with description of their functionality and usage), along with the final variant call and multiple  
399 sequence alignment files are available on GitHub  
400 (<https://github.com/matejmedvecky/anthraxdiversityscripts>).

401 The alignment of concatenated SNPs was analyzed using ModelFinder to determine the most  
402 appropriate model of nucleotide substitution (52). Subsequently, a maximum-likelihood  
403 phylogeny was estimated in IQ-Tree (53) under the Kimura-3-parameters (K3P) model, using  
404 1000 ultrafast bootstrap replicates (54). A distance matrix detailing SNP differences between  
405 isolates was constructed using snp-dists v0.6 (<https://github.com/tseemann/snp-dists>). The  
406 distance between GPS points was calculated using the pointDistance command in the R package  
407 *raster* (55). Isolation by distance was tested using Mantel test to assess the correlation between  
408 SNP distance and Euclidean geographic distance within the R package *adegenet* (56). All  
409 program versions and commands used, the distance matrix, as well as small custom scripts are  
410 available on GitHub ([https://github.com/tristanpwdennis/anthrax\\_diversity](https://github.com/tristanpwdennis/anthrax_diversity)).

411 To place the newly sequenced isolates within the global phylogeny of *B. anthracis*, 80 WGS  
412 from GenBank were accessed (Table S2), and a core genome alignment generated using Parsnp  
413 v1.1.2 (57). The resulting phylogeny indicated that NCA isolates belong to the Ancient A  
414 lineage. To further resolve the diversity among NCA isolates compared with other publicly  
415 available isolates from the same lineage, reads from eight additional isolates available on SRA  
416 from a study by Bruce et al. 2019 were accessed using fastq-dump from the SRA-toolkit: all  
417 isolates (n=4) belonging to the 3.2 lineage, and two arbitrarily selected isolates from each the 3.1  
418 and 3.3 lineages (Table S2). These were run through our SNP-calling pipeline as described  
419 above, resulting in a sequence alignment file free of -/N characters, which was used to infer a  
420 phylogeny in RAxML v8.2.11 (58) using a GTR model of nucleotide substitution, and using the  
421 Ames Ancestor reference genome as an outgroup.

## 422 **Simulation modelling**

423 The initial number of genomes in the inoculum was varied between one and 100 genomes to  
424 reflect uncertainty in anthrax infectious dose. In each bacterial generation, genomes underwent a  
425 round of replication followed by cell division and accordingly population size doubled in each  
426 generation. The number of mutations occurring in the replication of each genome was drawn  
427 from a Poisson distribution parameterized to reflect the estimated *B. anthracis* mutation rate (i.e.  
428  $\lambda = 0.004316$ ). This genome-level mutation rate is based on the genome size of 5.2 million base  
429 pairs and a mutation rate of  $8.3 \times 10^{-10}$  mutations per site (29); this represents an upper estimate  
430 of the mutation rate and was chosen as we were interested in estimating the upper limits on  
431 reasonable expectation of diversity emerging during the course of an infection initiated by a  
432 homogenous dose. Simulations were carried out for up to 30 generations (replication cycles), and  
433 results extrapolated to 40 generations, proposed to be the upper limit on the number of

434 replication cycles during an infection (11). Details of simulations run are provided in File S1.  
435 Pairs of genomes were repeatedly sampled from these simulated populations and the count of  
436 mutations separating each pair was calculated. Sampling was performed 100 times per  
437 generation for each simulation. Simulations, sampling of simulated populations, and linear  
438 models summarizing trends in the outcome of these processes were performed in R (59).

## 439 **Data availability**

440 Raw sequencing reads are available on European Nucleotide Archive SRA under accession  
441 number PRJEB45684.

## 442 **Acknowledgements**

443 We are grateful for all the support received for this research, particularly from the NCA  
444 community and authorities. We thank the Ngorongoro District Council, Ngorongoro  
445 Conservation Area Authority, District Veterinary Office, Tanzania Wildlife Research Institute  
446 and members of our field team – Sabore Ole Moko, Sironga Nanjicho, Kadogo Lerimba and  
447 Godwin Mshumba – for assistance with this study. We also thank the Directorate of Veterinary  
448 Services, Ministry of Agriculture, Livestock and Fisheries, and Ministry of Health, Community  
449 Development, Gender, Elderly and Children for their support. Finally, we thank Yi Xuan Chew  
450 and Nichith Kollanandi Ratheesh for initial assessments of the publicly available genomic data.  
451 Establishment and maintenance of the Zoonoses laboratory at KCRI (BTM) was supported by  
452 the BBSRC (BB/J010367/1), BBSRC Zoonoses and Emerging Livestock Systems (BB/L017679,  
453 BB/L018926, BB/L018845), and the Wellcome Trust (096400/Z/11/Z).

## 454 **References**

- 455 1. Kao RR, Haydon DT, Lycett SJ, Murcia PR. 2014. Supersize me: how whole-genome  
456 sequencing and big data are transforming epidemiology. *Trends Microbiol* 22:282–91.
- 457 2. Carlson CJ, Kracalik IT, Ross N, Alexander KA, Hugh-Jones ME, Fegan M, Elkin BT, Epp  
458 T, Shury TK, Zhang W, Bagirova M, Getz WM, Blackburn JK. 2019. The global  
459 distribution of *Bacillus anthracis* and associated anthrax risk to humans, livestock and  
460 wildlife. *Nat Microbiol* 4:1337–1343.
- 461 3. WHO. 2008. *Anthrax in Humans and Animals*. 4th Ed.
- 462 4. WHO. 2011. The control of neglected zoonotic diseases. Community-based interventions  
463 for prevention and control. Report of the third conference organized with ICONZ, DFID-  
464 RIU, Gates Foundation, SOS, EU, TDR and FAO with the participation of ILRI and OIE.,  
465 Geneva, Switzerland.
- 466 5. Van Ert MN, Easterday WR, Huynh LY, Okinaka RT, Hugh-Jones ME, Ravel J, Zanecki  
467 SR, Pearson T, Simonson TS, U'Ren JM, Kachur SM, Leadem-Dougherty RR, Rhoton SD,  
468 Zinser G, Farlow J, Coker PR, Smith KL, Wang B, Kenefic LJ, Fraser-Liggett CM, Wagner  
469 DM, Keim P. 2007. Global genetic population structure of *Bacillus anthracis*. *PLoS ONE*  
470 2:e461.
- 471 6. Sahl JW, Pearson T, Okinaka R, Schupp JM, Gillece JD, Heaton H, Birdsell D, Hepp C,  
472 Fofanov V, Nosedá R, Fasanella A, Hoffmaster A, Wagner DM, Keim P. 2016. A *Bacillus*  
473 *anthracis* genome sequence from the Sverdlovsk 1979 autopsy specimens. *mBio* 7: e01501-  
474 16.

- 475 7. Bruce SA, Schiraldi NJ, Kamath PL, Easterday WR, Turner WC. 2020. A classification  
476 framework for *Bacillus anthracis* defined by global genomic structure. *Evol Appl* 13:935–  
477 944.
- 478 8. Smith KL, DeVos V, Bryden H, Price LB, Hugh-Jones ME, Keim P. 2000. *Bacillus*  
479 *anthracis* diversity in Kruger National Park. *J Clin Microbiol* 38:3780–3784.
- 480 9. Simonson TS, Okinaka RT, Wang B, Easterday WR, Huynh L, U'Ren JM, Dukerich M,  
481 Zanecki SR, Kenefic LJ, Beaudry J, Schupp JM, Pearson T, Wagner DM, Hoffmaster A,  
482 Ravel J, Keim P. 2009. *Bacillus anthracis* in China and its relationship to worldwide  
483 lineages. *BMC Microbiol* 9:71.
- 484 10. Achtman M. 2008. Evolution, population structure, and phylogeography of genetically  
485 monomorphic bacterial pathogens. *Annu Rev Microbiol* 62:53–70.
- 486 11. Keim P, Van Ert MN, Pearson T, Vogler AJ, Huynh LY, Wagner DM. 2004. Anthrax  
487 molecular epidemiology and forensics: using the appropriate marker for different  
488 evolutionary scales. *Infect Genet Evol* 4:205–213.
- 489 12. Fasanella A, Serrecchia L, Chiaverini A, Garofolo G, Muuka GM, Mwambazi L. 2018. Use  
490 of Canonical Single Nucleotide Polymorphism (CanSNPs) to characterize *Bacillus*  
491 *anthracis* outbreak strains in Zambia between 1990 and 2014. *PeerJ* 6:e5270.
- 492 13. Beyer W, Bellan S, Eberle G, Ganz HH, Getz WM, Haumacher R, Hilss KA, Kilian W,  
493 Lazak J, Turner WC, Turnbull PCB. 2012. Distribution and molecular evolution of *Bacillus*  
494 *anthracis* genotypes in Namibia. *PLoS Negl Trop Dis* 6:e1534.

- 495 14. Maho A, Rossano A, Hächler H, Holzer A, Schelling E, Zinsstag J, Hassane MH,  
496 Toguebaye BS, Akakpo AJ, Van Ert M, Keim P, Kenefic L, Frey J, Perreten V. 2006.  
497 Antibiotic susceptibility and molecular diversity of *Bacillus anthracis* strains in Chad:  
498 detection of a new phylogenetic subgroup. J Clin Microbiol 44:3422–3425.
- 499 15. Girault G, Blouin Y, Vergnaud G, Derzelle S. 2014. High-throughput sequencing of  
500 *Bacillus anthracis* in France: investigating genome diversity and population structure using  
501 whole-genome SNP discovery. BMC Genomics 15:288.
- 502 16. Derzelle S, Girault G, Roest HIJ, Koene M. 2015. Molecular diversity of *Bacillus anthracis*  
503 in the Netherlands: investigating the relationship to the worldwide population using whole-  
504 genome SNP discovery. Infect Genet Evol 32:370–376.
- 505 17. Derzelle S, Girault G, Kokotovic B, Angen Ø. 2015. Whole genome-sequencing and  
506 phylogenetic analysis of a historical collection of *Bacillus anthracis* strains from Danish  
507 cattle. PLoS ONE 10:e0134699.
- 508 18. Lienemann T, Beyer W, Pelkola K, Rossow H, Rehn A, Antwerpen M, Grass G. 2018.  
509 Genotyping and phylogenetic placement of *Bacillus anthracis* isolates from Finland, a  
510 country with rare anthrax cases. BMC Microbiology 18:102.
- 511 19. Lekota KE, Hassim A, Madoroba E, Hefer CA, van Heerden H. 2020. Phylogenomic  
512 structure of *Bacillus anthracis* isolates in the Northern Cape Province, South Africa  
513 revealed novel single nucleotide polymorphisms. Infection, Genetics and Evolution  
514 80:104146.



- 515 20. Carlson CJ, Getz WM, Kausrud KL, Cizauskas CA, Blackburn JK, Bustos Carrillo FA,  
516 Colwell R, Easterday WR, Ganz HH, Kamath PL, Økstad OA, Turner WC, Kolstø A-B,  
517 Stenseth NC. 2018. Spores and soil from six sides: interdisciplinarity and the environmental  
518 biology of anthrax (*Bacillus anthracis*). *Biol Rev Camb Philos Soc* 93:1813–1831.
- 519 21. Döpfer D, Buist W, Soyer Y, Munoz MA, Zadoks RN, Geue L, Engel B. 2008. Assessing  
520 genetic heterogeneity within bacterial species isolated from gastrointestinal and  
521 environmental samples: how many isolates does it take? *Appl Environ Microbiol* 74:3490–  
522 3496.
- 523 22. Worby CJ, Lipsitch M, Hanage WP. 2014. Within-host bacterial diversity hinders accurate  
524 reconstruction of transmission networks from genomic distance data. *PLoS Comput Biol*  
525 10:e1003549.
- 526 23. Futse JE, Brayton KA, Dark MJ, Knowles DP, Palmer GH. 2008. Superinfection as a driver  
527 of genomic diversification in antigenically variant pathogens. *Proc Natl Acad Sci USA*  
528 105:2123–2127.
- 529 24. Sintchenko V, Holmes EC. 2015. The role of pathogen genomics in assessing disease  
530 transmission. *BMJ* 350:h1314.
- 531 25. Didelot X, Walker AS, Peto TE, Crook DW, Wilson DJ. 2016. Within-host evolution of  
532 bacterial pathogens. *Nat Rev Microbiol* 14:150–162.
- 533 26. Paterson GK, Harrison EM, Murray GGR, Welch JJ, Warland JH, Holden MTG, Morgan  
534 FJE, Ba X, Koop G, Harris SR, Maskell DJ, Peacock SJ, Herrtage ME, Parkhill J, Holmes

- 535 MA. 2015. Capturing the cloud of diversity reveals complexity and heterogeneity of MRSA  
536 carriage, infection and transmission. *Nat Commun* 6:6560.
- 537 27. Alamil M., Hughes J., Berthier K., Desbiez C., Thébaud G., Soubeyrand S. 2019. Inferring  
538 epidemiological links from deep sequencing data: a statistical learning approach for human,  
539 animal and plant diseases. *Philosophical Transactions of the Royal Society B: Biological  
540 Sciences* 374:20180258.
- 541 28. Beyer W, Turnbull PCB. 2013. Co-infection of an animal with more than one genotype can  
542 occur in anthrax. *Lett Appl Microbiol* 57:380–384.
- 543 29. Ågren J, Finn M, Bengtsson B, Segerman B. 2014. Microevolution during an anthrax  
544 outbreak leading to clonal heterogeneity and penicillin resistance. *PLoS ONE* 9:e89112.
- 545 30. Easterday WR, Ponciano JM, Gomez JP, Van Ert MN, Hadfield T, Bagamian K, Blackburn  
546 JK, Stenseth NC, Turner WC. 2020. Coalescence modeling of intrainfection *Bacillus  
547 anthracis* populations allows estimation of infection parameters in wild populations. *Proc  
548 Natl Acad Sci USA* 117:4273-4280.
- 549 31. Vogler AJ, Busch JD, Percy-Fine S, Tipton-Hunton C, Smith KL, Keim P. 2002. Molecular  
550 analysis of rifampin resistance in *Bacillus anthracis* and *Bacillus cereus*. *Antimicrob  
551 Agents Chemother* 46:511–513.
- 552 32. Saile E, Koehler TM. 2006. *Bacillus anthracis* multiplication, persistence, and genetic  
553 exchange in the rhizosphere of grass plants. *Appl Environ Microbiol* 72:3168–3174.

- 554 33. Braun P, Grass G, Aceti A, Serrecchia L, Affuso A, Marino L, Grimaldi S, Pagano S,  
555 Hanczaruk M, Georgi E, Northoff B, Schöler A, Schloter M, Antwerpen M, Fasanella A.  
556 2015. Microevolution of Anthrax from a Young Ancestor (M.A.Y.A.) suggests a soil-borne  
557 life cycle of *Bacillus anthracis*. PLoS ONE 10:e0135346.
- 558 34. Turner WC, Kausrud KL, Beyer W, Easterday WR, Barandongo ZR, Blaschke E, Cloete  
559 CC, Lazak J, Van Ert MN, Ganz HH, Turnbull PCB, Stenseth NC, Getz WM. 2016. Lethal  
560 exposure: An integrated approach to pathogen transmission via environmental reservoirs.  
561 Sci Rep 6:27311.
- 562 35. Biek R, Pybus OG, Lloyd-Smith JO, Didelot X. 2015. Measurably evolving pathogens in  
563 the genomic era. Trends in Ecology & Evolution 30:306–313.
- 564 36. Dragon DC, Bader DE, Mitchell J, Woollen N. 2005. Natural dissemination of *Bacillus*  
565 *anthracis* spores in northern Canada. Appl Environ Microbiol 71:1610–1615.
- 566 37. Blackburn JK, Ganz HH, Ponciano JM, Turner WC, Ryan SJ, Kamath P, Cizauskas C,  
567 Kausrud K, Holt RD, Stenseth NC, Getz WM. 2019. Modeling  $R_0$  for pathogens with  
568 environmental transmission: Animal movements, pathogen populations, and local infectious  
569 zones. Int J Environ Res Public Health 16:954.
- 570 38. 1979. Vultures as carriers of anthrax. J S Afr Vet Assoc 50:35.
- 571 39. Stears K, Schmitt MH, Turner WC, McCauley DJ, Muse EA, Kiwango H, Mathayo D,  
572 Mutayoba BM. 2021. Hippopotamus movements structure the spatiotemporal dynamics of  
573 an active anthrax outbreak. Ecosphere 12:e03540.

- 574 40. Forde TL, Orsel K, Zadoks RN, Biek R, Adams LG, Checkley SL, Davison T, De Buck J,  
575 Dumond M, Elkin BT, Finnegan L, Macbeth BJ, Nelson C, Niptanatiak A, Sather S,  
576 Schwantje HM, Van Der Meer F, Kutz SJ. 2016. Bacterial genomics reveal the complex  
577 epidemiology of an emerging pathogen in arctic and boreal ungulates. *Front Microbiol*  
578 7:1759.
- 579 41. National Bureau of Statistics, Office of Chief Government Statistician. 2013. 2012  
580 Population and Housing Census. The United Republic of Tanzania.
- 581 42. Mwakapeje ER, Høgset S, Fyumagwa R, Nonga HE, Mdegela RH, Skjerve E. 2018.  
582 Anthrax outbreaks in the humans - livestock and wildlife interface areas of Northern  
583 Tanzania: a retrospective record review 2006–2016. *BMC Public Health* 18:106.
- 584 43. Lembo T, Hampson K, Auty H, Beesley CA, Bessell P, Packer C, Halliday J, Fyumagwa R,  
585 Hoare R, Ernest E, Mentzel C, Mlengeya T, Stamey K, Wilkins PP, Cleaveland S. 2011.  
586 Serologic surveillance of anthrax in the Serengeti ecosystem, Tanzania, 1996-2009.  
587 *Emerging Infect Dis* 17:387–394.
- 588 44. Aminu OR, Lembo T, Zadoks RN, Biek R, Lewis S, Kiwelu I, Mmbaga BT, Mshanga D,  
589 Shirima G, Denwood M, Forde TL. 2020. Practical and effective diagnosis of animal  
590 anthrax in endemic low-resource settings. *PLOS Neglected Tropical Diseases* 14:e0008655.
- 591 45. Bolger AM, Lohse M, Usadel B. 2014. Trimmomatic: a flexible trimmer for Illumina  
592 sequence data. *Bioinformatics* 30:2114–2120.
- 593 46. Gurevich A, Saveliev V, Vyahhi N, Tesler G. 2013. QUAST: quality assessment tool for  
594 genome assemblies. *Bioinformatics* 29:1072–1075.

- 595 47. Wood DE, Salzberg SL. 2014. Kraken: ultrafast metagenomic sequence classification using  
596 exact alignments. *Genome Biol* 15:R46.
- 597 48. Connor TR, Loman NJ, Thompson S, Smith A, Southgate J, Poplawski R, Bull MJ,  
598 Richardson E, Ismail M, Elwood-Thompson S, Kitchen C, Guest M, Bakke M, Sheppard  
599 SK, Pallen MJ. 2016. CLIMB (the Cloud Infrastructure for Microbial Bioinformatics): an  
600 online resource for the medical microbiology community. *Microb Genom* 2:e000086.
- 601 49. Broad Institute. Picard Tools. Available: <http://broadinstitute.github.io/picard/>
- 602 50. García-Alcalde F, Okonechnikov K, Carbonell J, Cruz LM, Götz S, Tarazona S, Dopazo J,  
603 Meyer TF, Conesa A. 2012. Qualimap: evaluating next-generation sequencing alignment  
604 data. *Bioinformatics* 28:2678–2679.
- 605 51. Koboldt DC, Zhang Q, Larson DE, Shen D, McLellan MD, Lin L, Miller CA, Mardis ER,  
606 Ding L, Wilson RK. 2012. VarScan 2: somatic mutation and copy number alteration  
607 discovery in cancer by exome sequencing. *Genome Res* 22:568–576.
- 608 52. Kalyaanamoorthy S, Minh BQ, Wong TKF, von Haeseler A, Jermin LS. 2017.  
609 ModelFinder: fast model selection for accurate phylogenetic estimates. *Nature Methods*  
610 14:587–589.
- 611 53. Nguyen L-T, Schmidt HA, von Haeseler A, Minh BQ. 2015. IQ-TREE: A Fast and  
612 Effective Stochastic Algorithm for Estimating Maximum-Likelihood Phylogenies. *Mol Biol*  
613 *Evol* 32:268–274.

- 614 54. Minh BQ, Nguyen MAT, von Haeseler A. 2013. Ultrafast approximation for phylogenetic  
615 bootstrap. *Mol Biol Evol* 30:1188–1195.
- 616 55. raster: Geographic Data Analysis and Modeling version 3.0-12 from CRAN.
- 617 56. Jombart T. 2008. adegenet: a R package for the multivariate analysis of genetic markers.  
618 *Bioinformatics* 24:1403–1405.
- 619 57. Treangen TJ, Ondov BD, Koren S, Phillippy AM. 2014. The Harvest suite for rapid core-  
620 genome alignment and visualization of thousands of intraspecific microbial genomes.  
621 *Genome Biol* 15:524.
- 622 58. Stamatakis A. 2014. RAxML Version 8: A tool for phylogenetic analysis and post-analysis  
623 of large phylogenies. *Bioinformatics* 30:1312-1313.
- 624 59. R Core Team. 2018. R: A language and environment for statistical computing. R  
625 Foundation for Statistical Computing, Vienna, Austria.
- 626 60. UNEP-WCMC. 2020. Protected Area Profile for Ngorongoro Conservation Area. World  
627 Database of Protected Areas. Available: [www.protectedplanet.net](http://www.protectedplanet.net)
- 628 61. Wickham H. 2009. ggplot2: Elegant Graphics for Data Analysis. Springer-Verlag, New  
629 York.
- 630 62. Pebesma E. 2018. Simple features for R: Standardized support for spatial vector data. *The R*  
631 *Journal* 10:439–446.

- 632 63. Yu G, Smith DK, Zhu H, Guan Y, Lam TT-Y. 2017. ggtree: an R package for visualization  
633 and annotation of phylogenetic trees with their covariates and other associated data.  
634 Methods Ecol Evol 8:28–36.
- 635 64. Ciccarelli FD, Doerks T, Mering C von, Creevey CJ, Snel B, Bork P. 2006. Toward  
636 automatic reconstruction of a highly resolved Tree of Life. Science 311:1283–1287.
- 637 65. Hsieh TC, Ma KH, Chao A. 2016. iNEXT: an R package for rarefaction and extrapolation  
638 of species diversity (Hill numbers). Methods Ecol Evol 7:1451–1456.

639

## 640 Figures

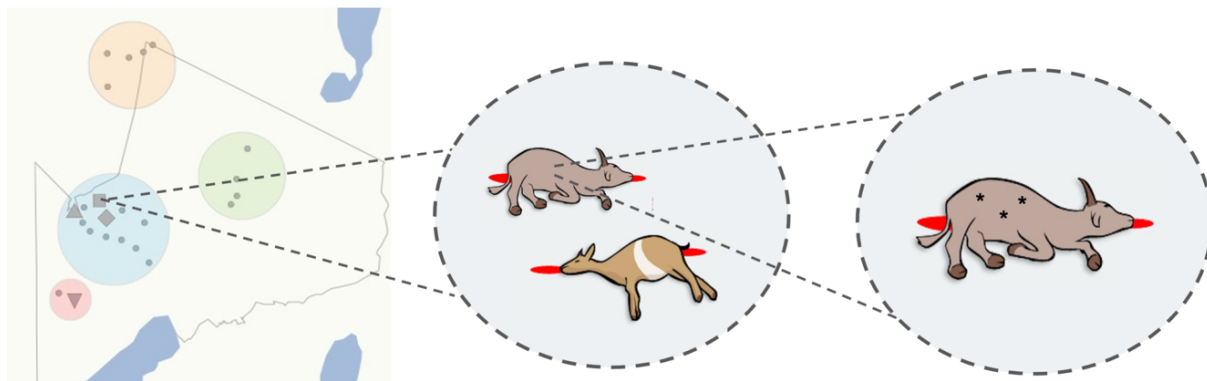

- 641 1. Geographical Groups 2. Epidemiological Clusters 3. Within Infected Host

642 **Fig 1. Hierarchical levels at which the genomic diversity of *Bacillus anthracis* was studied.**

- 643 1. Sequenced isolates originating from livestock carcasses sampled throughout the anthrax  
644 hyperendemic Ngorongoro Conservation Area (NCA), northern Tanzania, (shown as grey dots in  
645 panel 1) were categorized into four geographical groups (colored circles); 2. A subset of these  
646 isolates were from spatio-temporally linked pairs of carcasses ( $n = 4$ , represented by grey shapes  
647 in panel 1), referred to as ‘epidemiological clusters’; 3. Multiple isolates ( $n = 2-4$ ; represented by

648 asterix) were sequenced from individual carcasses, either originating from multiple sample  
649 types (e.g. tissue and blood), and/or multiple isolates sequenced from a single sample. The shape  
650 file for the NCA was provided by Tanzania National Parks (TANAPA) (60).

651

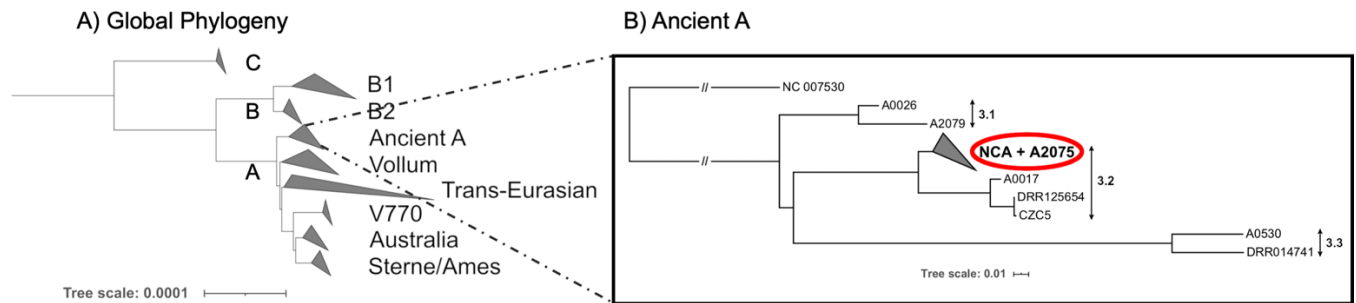

652

653 **Fig 2. Phylogenetic position of *Bacillus anthracis* isolated from the Ngorongoro**

654 **Conservation Area within the global population.** A) Global phylogeny of *B. anthracis*,

655 showing the major clades (A, B, and C) and sub-lineages. This tree was estimated based on a

656 core single nucleotide polymorphism (SNP) phylogeny of 80 publicly available genomes (Table

657 S2). B) Maximum likelihood phylogenetic tree of the Ancient A lineage (Cluster 3 based on

658 Bruce et al., 2019). All isolates from the Ngorongoro Conservation Area (NCA) form a

659 monophyletic lineage within Cluster 3.2, along with the publicly available isolate A2075

660 (SRR2968187) isolated in 1999 from a baboon in central Tanzania. This tree was inferred using

661 the general time reversible (GTR) model of nucleotide substitution, using the Ames Ancestor

662 reference genome (NC\_007530) as an outgroup. Tree scales reflect number of substitutions per

663 site.



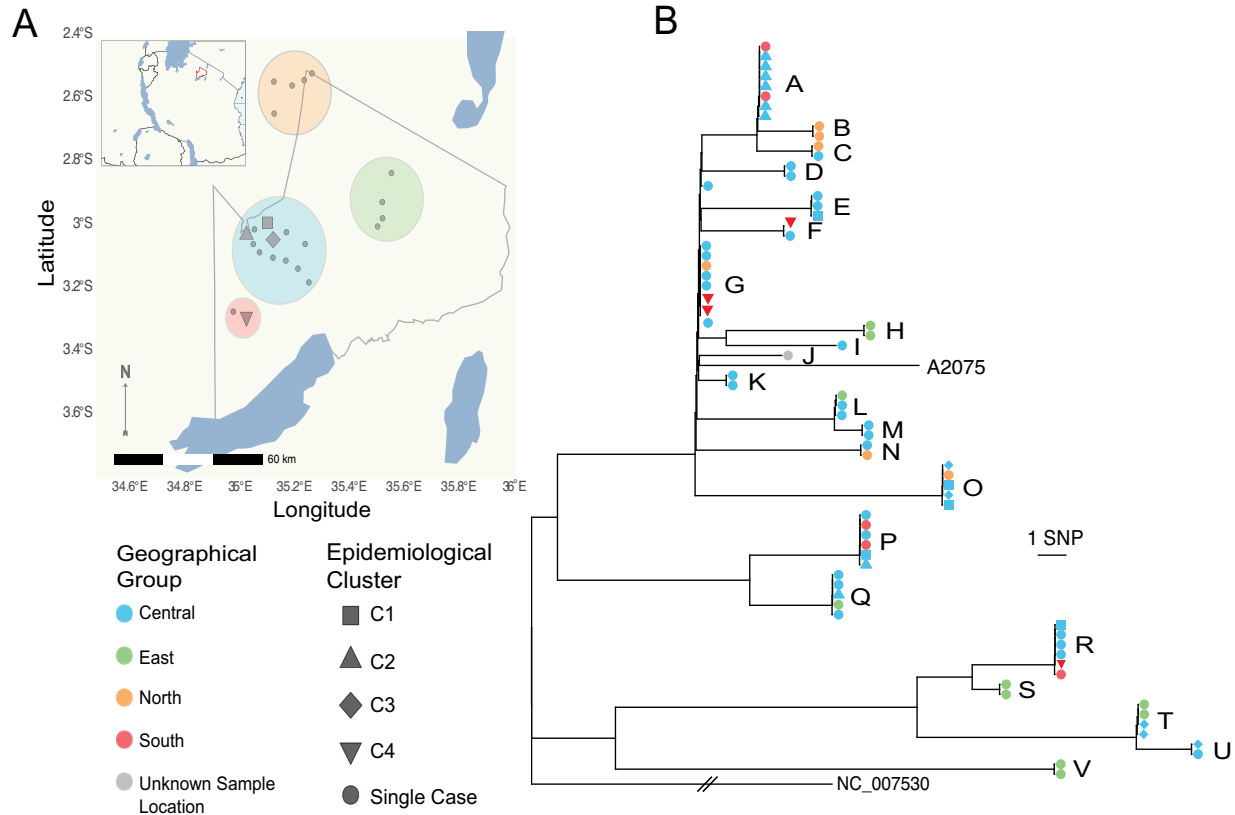

664

665 **Fig 3. Phylogeography of *Bacillus anthracis* in the hyperendemic area of the Ngorongoro**

666 **Conservation Area, Tanzania.** A) Spatial distribution of carcasses from which *B. anthracis*

667 isolates were obtained. The map outlines the Ngorongoro Conservation Area (NCA) and shows

668 its location in northern Tanzania (outlined in red in inset). Carcasses were assigned to four

669 geographical groups within the NCA based on spatial proximity, shown by colored circles. B)

670 Maximum likelihood tree estimating the phylogenetic relationship among *B. anthracis* isolates

671 from the NCA. This tree is based on an un-gapped alignment of 125 high quality core single

672 nucleotide polymorphisms (SNPs) across the whole chromosome, rooted to the Ames Ancestor

673 reference sequence (NC\_005730) and including the publicly available isolate A2075

674 (SRR2968187) originating from central Tanzania. Using the more closely related isolates from

675 Cluster 3.2 as an outgroup produced the same root position. Isolates are colored on the tree based

676 on their collection site (geographical group) within the NCA. Epidemiological clusters of cases

677 (pairs of carcasses sampled from the same or neighboring households on the same or consecutive  
678 days) are distinguished by symbol shape. Letters distinguish the 22 unique genotypes (SNP  
679 profiles) detected. Isolate-labelled versions of these figures can be found as Fig. S4 and S5 in the  
680 Supporting Information. The base earth, river and lake data for the map were downloaded from  
681 Natural Earth (<https://www.naturalearthdata.com/>). Figure was plotted in R v.3.6.1 with *ggplot2*  
682 (61), with the addition of the *sf* (62) and *ggtree* (63) packages.  
683

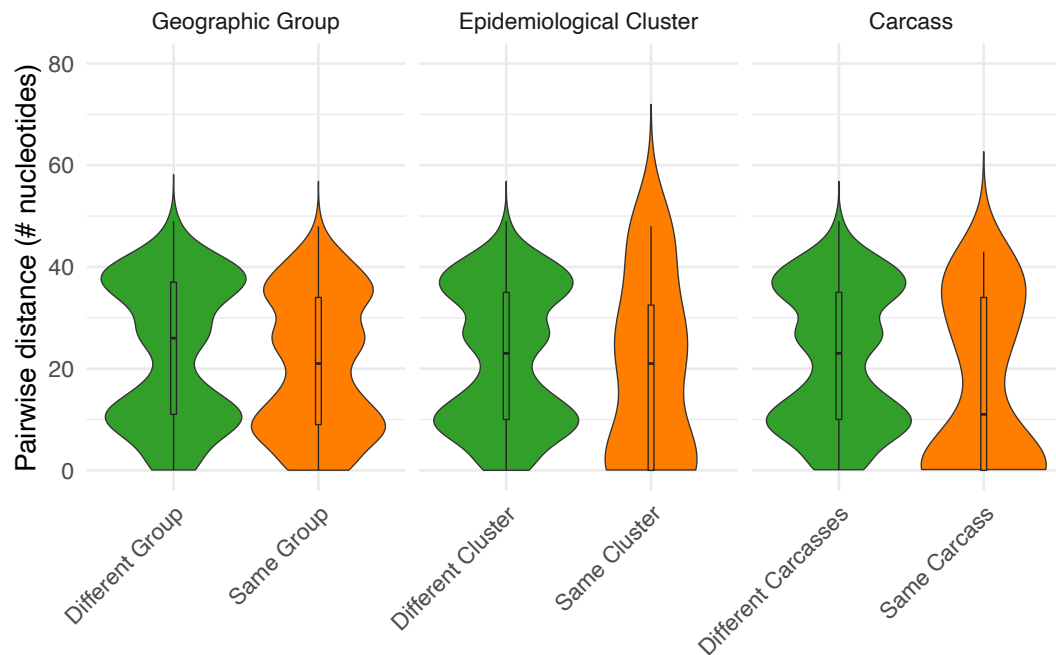

684

685 **Fig 4. Comparative numbers of single nucleotide differences among *Bacillus anthracis***  
686 **isolates from hierarchical spatial scales.** Violin plots comparing pairwise nucleotide (SNP)  
687 differences between all *B. anthracis* isolates from the Ngorongoro Conservation Area versus  
688 SNP differences between isolates from i) within the same geographical group; ii) within the same  
689 epidemiological cluster (but not from the same carcass); and iii) within a single carcass. Central

690 boxplot shows median and interquartile range, with whiskers showing minimum and maximum  
691 values.

692

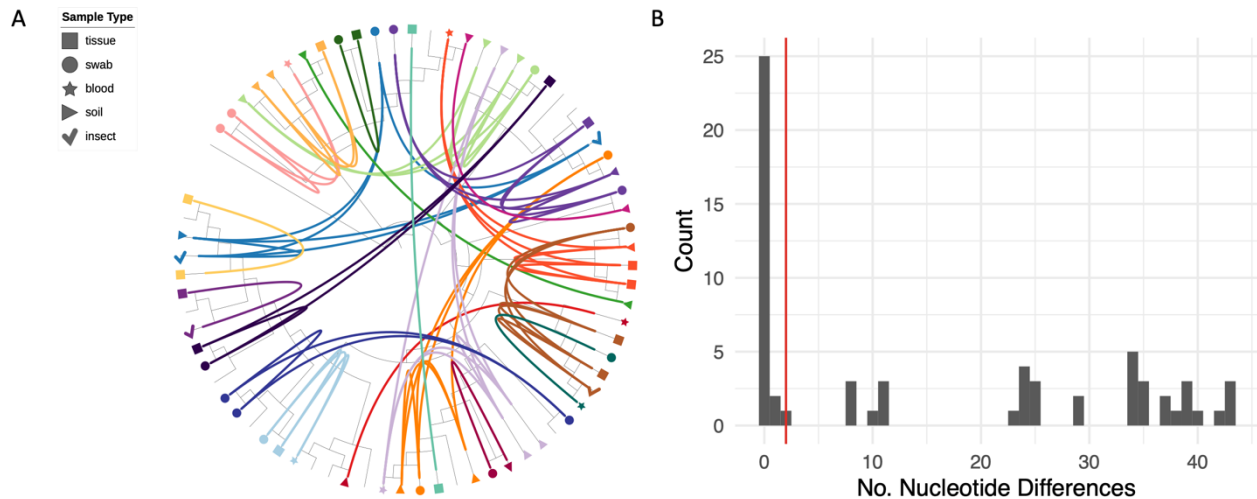

693

694 **Fig 5. Within-host diversity of *Bacillus anthracis* among livestock in the Ngorongoro**

695 **Conservation Area.** A) Circularized maximum likelihood tree – based on high quality core  
696 single nucleotide polymorphisms (SNPs) – displayed as a cladogram (branch-lengths ignored),

697 rooted to Ames Ancestor reference genome (NC\_005730). Isolates from the same carcass are

698 shown in the same color and are linked by inner connecting lines. Isolates without labels are

699 singletons (i.e. only one isolate sequenced per carcass site). Sample type is shown by the

700 different symbol shapes indicated in the legend. The figure was prepared using iTOL (64). For

701 labeled taxa, see Fig. S7. B) Histogram showing the relative frequency of pairwise SNP

702 differences among *B. anthracis* isolates collected from the same carcass. Red line shows 99%

703 upper limit of nucleotide differences observed among sampled pairs of genomes based on

704 simulation of within host evolution. Results suggest that almost all diversity observed within the

705 same infected host is the result of a heterogeneous inoculum.

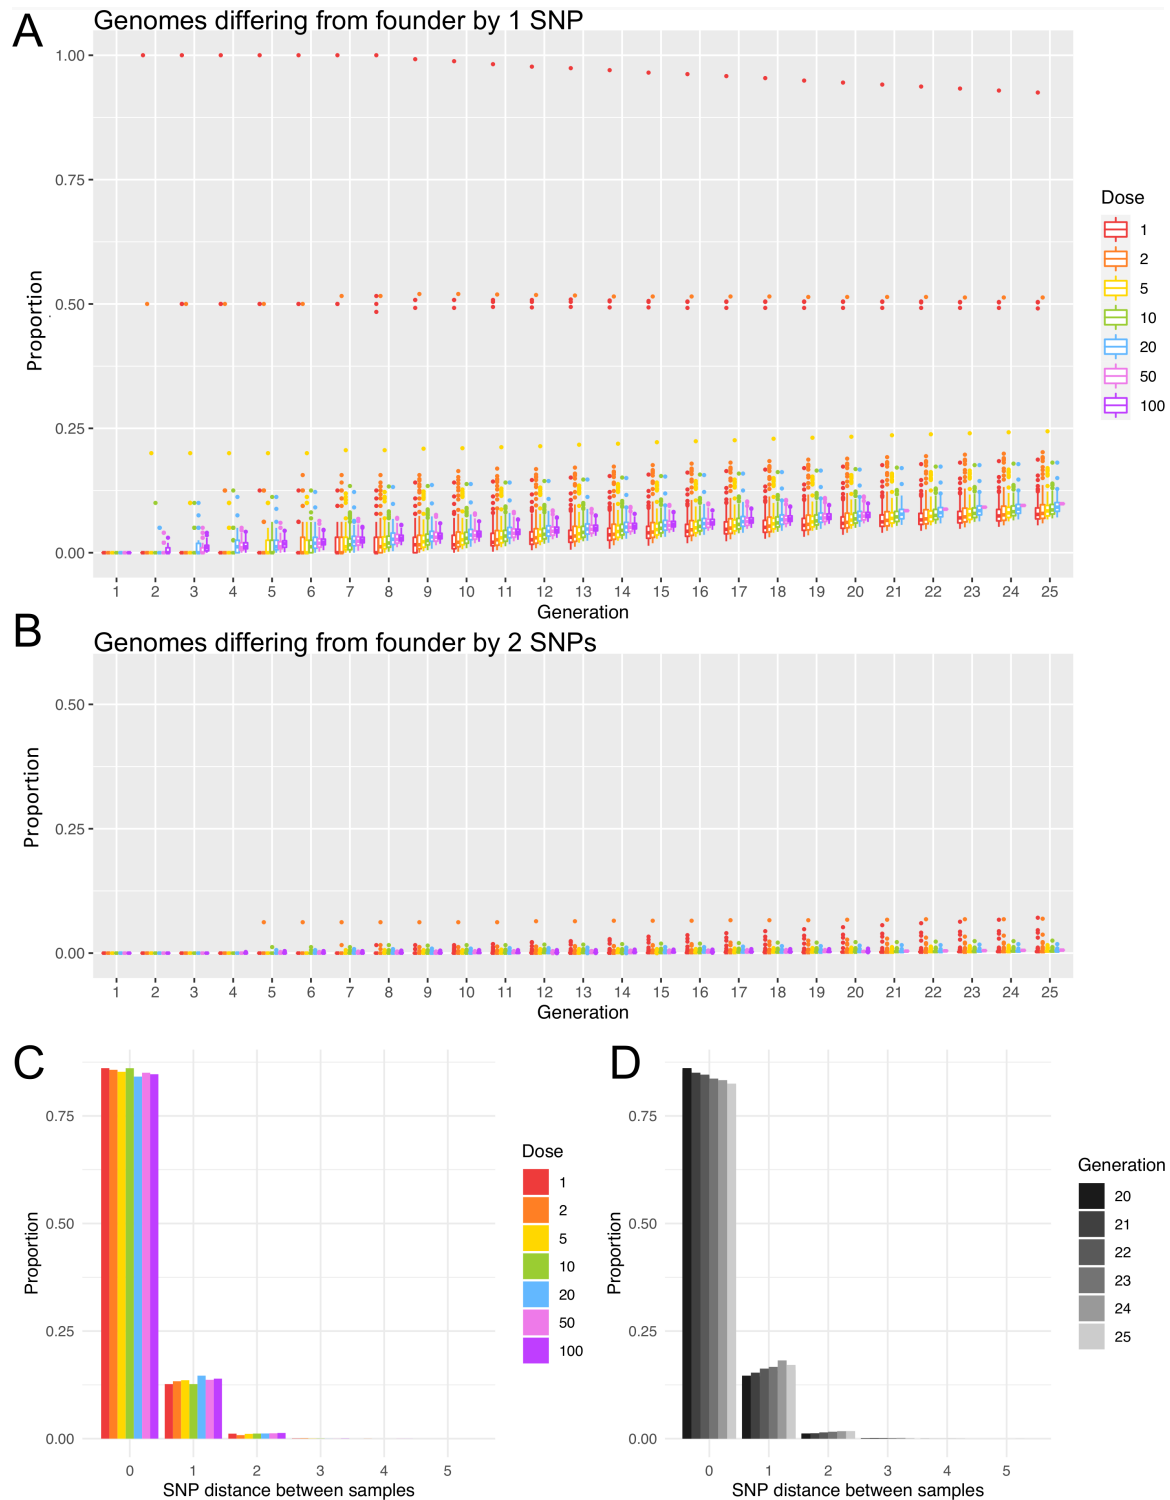

706

707 **Fig 6. Simulation of within-host populations and sampling of resulting genetic diversity.**

708 Box and whiskers plots show the proportion of genomes across simulated populations that differ

709 from the founding genome by either one nucleotide (A) or by two nucleotides (B). Boxes

710 represent the interquartile range with a line showing the median and with outliers shown as  
711 points. Both boxes and outliers are colored by inoculum size (dose) according to the legend.  
712 Simulations were run for 25 generations, or 20 generations for larger inoculum sizes. Greater  
713 stochastic heterogeneity was observed for lower starting doses. Note that in (B), only outliers are  
714 visible as the proportions observed were very low. C) Bar-plot showing the relationship between  
715 inoculum size (dose) and single nucleotide polymorphism (SNP) distances between pairs of  
716 sampled genomes. Bars represent average proportions of pairwise SNP differences between  
717 genomes sampled from simulated within-host populations. Populations were simulated from  
718 various inoculum sizes and were sampled in the 20<sup>th</sup> generation after 19 replication cycles. Fifty  
719 simulations were run from an initial dose of 20, and 100 simulations were run from each of the  
720 other inoculum sizes, with each simulated population sampled 100 times in each generation. D)  
721 Bar-plot showing the relationship between the number of replication cycles and SNP distances  
722 between pairs of sampled genomes. Populations were simulated for 25 generations and samples  
723 taken in generations 20-25 are represented in shades of grey according to the legend. Proportions  
724 are averaged across simulations initiated with inoculum sizes of 1, 2, 5, 10 and 20 and sampled  
725 repeatedly.

### A. Clonal transmission

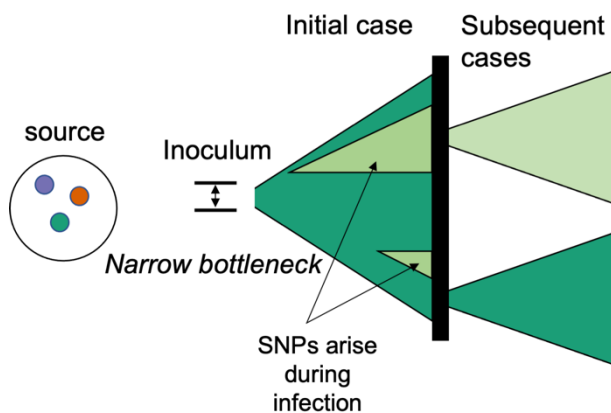

### B. Heterogenous transmission

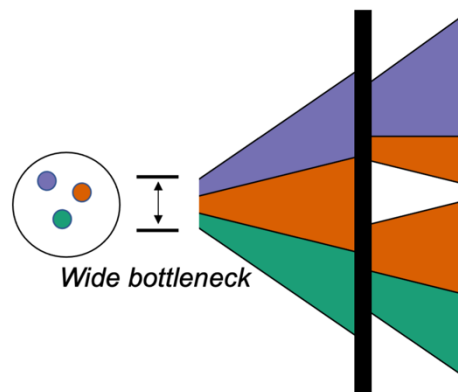

726

727 **Fig 7. Conceptual framework for the acquisition of within-host diversity of *Bacillus***  
728 ***anthracis*.** Colors represent different genotypes of *B. anthracis* (with multiple nucleotide  
729 differences), while different shades (i.e. light green) represent single nucleotide variants arising  
730 during the course of infection. Vertical black lines represent the environment (e.g. soil, water)  
731 from which subsequent cases of anthrax arise through exposure to *B. anthracis* spores. A) Example of infections stemming from small transmission bottleneck (inoculum of few spores),  
732 resulting in primarily clonal transmission. Where the bottleneck is narrow, a limited number of  
733 genotypes could comprise the inoculum, regardless of the number of variants present in the  
734 environment. A small number of SNPs may arise during the course of infection (see Figs 5B and  
735 6), but are unlikely to be transmitted unless they arise early during the course of infection. These  
736 variants rarely differ from the founding genotype by > 1-2 SNPs (Table S5). B) Example of  
737 infections stemming from a wide bottleneck (infectious dose with multiple spores), wherein  
738 sufficient numbers of spores comprise the inoculum such that multiple genotypes present in the  
739 environmental source may seed initial and subsequent infections. Our results strongly support  
740 heterogenous transmission (B), either from single or multiple carcass sites, and a large  
741 transmission bottleneck. Figure adapted from Ågren et al., 2014.

743

## 744 **Supporting Information**

745 **Fig S1. Rarefaction curve of *Bacillus anthracis* genotypic diversity within the study area.**  
746 Based on inclusion of all isolates sequenced (n = 73, left) and on all isolates that were not  
747 sampled as part of an epidemiological cluster (n = 51, right), which might be expected to be non-  
748 independent. Results suggest genotypes within this population have been exhaustively sampled

749 (i.e. that further sampling would not be expected to reveal additional genotypes). Figure  
750 generated in R package iNEXT (65).

751 **Fig S2. Histogram showing the relative frequency of pairwise nucleotide (SNP) differences**  
752 **among *B. anthracis* isolates.** Includes 73 isolates from the Ngorongoro Conservation Area,  
753 northern Tanzania.

754 **Fig S3. Scatter plots showing the number of nucleotide differences as a function of**  
755 **geographic difference between the sampling locations.** Geographic distance (in meters) is  
756 shown on the x-axis versus nucleotide differences on the y-axis, with each point representing a  
757 pair of isolates. A) All *Bacillus anthracis* isolates from the study area. B) The same relationship  
758 is observed when limited to isolates from the dominant clade; this was done in order to account  
759 for deeper divergences potentially obscuring patterns.

760 **Fig S4. Locations of carcasses sampled within the Ngorongoro Conservation Area,**  
761 **northern Tanzania.** Each carcass is assigned a unique identifier (Table S1). Epidemiological  
762 clusters are the same as those explained for Fig 3 and Fig S5.

763 **Fig S5. Phylogenetic relationship among *Bacillus anthracis* isolates from the Ngorongoro**  
764 **Conservation Area.** Estimated through maximum likelihood, based on high quality core SNPs.  
765 Geographic groups and epidemiological clusters are the same as those explained for Fig 3. Each  
766 isolate is attributed to a carcass ID, with the sample type indicated following the underscore (B =  
767 blood, D = soil, I = insect, S = swab, T = tissue). A number follows the sample type if more than  
768 one isolate was sequenced from the same sample.

769 **Fig S6. Genotypes of *Bacillus anthracis* observed in isolates from within and between pairs**  
770 **of carcasses from the same epidemiological clusters (C1-4).** Genotype letters correspond to

771 those in Fig 3 and Fig S5. Individual carcasses are numbered /1 or /2. In cluster C3, two isolates  
772 were from a soil sample (C3/1) collected at the same household as the two cases (C3/2 and  
773 C3/3); genotype T from this soil sample was shared with an isolate from C3/2. Otherwise, only  
774 in C2 was there evidence of a shared genotype between pairs of carcasses (genotype A). Thus,  
775 the level of sampling conducted here (1-4 isolates per carcass) did not produce evidence for the  
776 same combinations of genotypes being found among linked carcasses.

777 **Fig S7. Within-host diversity of *Bacillus anthracis* isolated from livestock in the**  
778 **Ngorongoro Conservation Area of northern Tanzania.** This circularized maximum likelihood  
779 tree – based on high quality core single nucleotide polymorphisms – is displayed as a cladogram  
780 (branch-lengths ignored). Isolates from the same carcass are shown in the same colour and linked  
781 by inner connecting lines. Isolates in black are singletons (i.e. only one isolate sequenced per  
782 carcass site). The figure was prepared using ITOL (64).

783 **Fig S8. Proportion of simulated within-host populations identical to the inoculating genome**  
784 **over 25 generations.** Populations were simulated from homogenous inoculating doses of  
785 varying size (A-G) and each line tracks a single simulated population through generations.  
786 Represented are 100 simulations run for 25 generations from doses 1, 2, 5 and 10; 50 simulations  
787 run for 25 generations (dose 20); 100 simulations run for 20 generations from doses 50 and 100  
788 and 7 simulations run for 25 generations from inoculum dose of 50.

789 **Fig S9. Proportion of simulated within-host populations differing from the inoculating**  
790 **genome by one nucleotide (SNP).** Populations were simulated from homogenous inoculating  
791 doses of varying size (A-G) and each line tracks a single simulated population through  
792 generations. Represented are 100 simulations run for 25 generations from doses 1, 2, 5 and 10;



793 50 simulations run for 25 generations (dose 20); 100 simulations run for 20 generations from  
794 doses 50 and 100 and 7 simulations run for 25 generations from inoculum dose of 50.

795 **Fig S10. Proportion of simulated within-host populations differing from the inoculating**  
796 **genome by two nucleotides (SNPs).** Populations were simulated from homogenous inoculating  
797 doses of varying size (A-G) and each line tracks a single simulated population through  
798 generations. Represented are 100 simulations run for 25 generations from doses 1, 2, 5 and 10;  
799 50 simulations run for 25 generations (dose 20); 100 simulations run for 20 generations from  
800 doses 50 and 100 and 7 simulations run for 25 generations from inoculum dose of 50.

801 **Table S1. Metadata and sequence quality metrics of *Bacillus anthracis* isolates included in**  
802 **this study.** Each isolate is attributed to a carcass ID, with the sample type indicated following the  
803 underscore (B = blood, D = soil, I = insect, S = swab, T = tissue). A number follows the sample  
804 type if more than one isolate was sequenced from the same sample.

805 **Table S2. Publicly available *Bacillus anthracis* isolates included to contextualize those from**  
806 **the Ngorongoro Conservation Area.** Sheet 1: Publicly available global collection of assembled  
807 *B. anthracis* genomes. Sheet 2: Publicly available sequence data for Ancient A isolates, available  
808 on SRA.

809 **Table S3. Identical isolates found from different geographical groups.**

810 **Table S4. Identical or nearly identical isolates from carcasses sampled several months**  
811 **apart.**

812 **Table S5. Single nucleotide polymorphism (SNP) distances among pairs of isolates sampled**  
813 **from simulated within-host populations of *Bacillus anthracis*.** Proportion of pairs of isolates

814 in evolved populations with different SNP distances across varying initial inoculum size (dose),

815 sampled in generations 20 and 25, and mean SNP differences across sampled pairs.

816 **File S1. Supplementary methods and results.**
